# Supplementary material for: Calcium triggered self-assembly of alginate-graft-POEGMA via RAFT for the encapsulation of lipophillic actives
Source: Royal Society of Chemistry journal article supplement (doi:10.1039/c7tb01670k), 2017-01-01
Supplement: c7tb01670k1.pdf [file c7tb01670k1.pdf]

## Self-assembly of Alginate Based Graft Copolymers into Nanoparticles

Jatin N Kumar\*, Victoria Y.T. Pang, Shalen X. L. Aik

### Supplementary Information

**Table S1:** Summary of reaction time, conversion and degree of polymerization (DP<sub>n</sub>) determined by <sup>1</sup>H NMR,  $M_n^{GPC}$  and its associated PDI (Đ) as determined by size exclusion chromatography with a single refractive index detector and PMMA calibration

|     | No. | Reaction Time | Conversion (%) | DP <sub>n</sub> | $M_n^{theo}$ (kDa) | $M_n^{GPC}$ (kDa) | Đ    |
|-----|-----|---------------|----------------|-----------------|--------------------|-------------------|------|
| HMW | 1   | 45            | 2.17           | 5               | 267                | 56.5              | 2.13 |
|     | 2   | 90            | 3.45           | 11              | 333                | 76.1              | 2.40 |
|     | 3   | 135           | 4.88           | 16              | 387                | 78.3              | 2.57 |
|     | 4   | 180           | 8.33           | 25              | 485                | 89.9              | 3.01 |
|     | 5   | 225           | 11.29          | 35              | 594                | 92.6              | 2.91 |
|     | 6   | 270           | 14.86          | 48              | 735                | 96.8              | 3.06 |
| LMW | 1   | 45            | 7.69           | 25              | 508                | 65.8              | 3.09 |
|     | 2   | 60            | 8.33           | 35              | 682                | 76.7              | 3.12 |
|     | 3   | 90            | 11.76          | 42              | 804                | 82.0              | 3.42 |
|     | 4   | 105           | 15.63          | 50              | 943                | 86.2              | 3.40 |
|     | 5   | 135           | 20.00          | 58              | 1,083              | 88.0              | 3.38 |
|     | 6   | 150           | 21.74          | 62              | 1,152              | 90.2              | 3.17 |
|     | 7   | 180           | 25.00          | 66              | 1,222              | 112.2             | 2.97 |

$M_n^{theo}$ :  $M_n^{GPC}$  of alginate + (DP<sub>n</sub> \* 300 \* no. of RAFT agents per backbone)

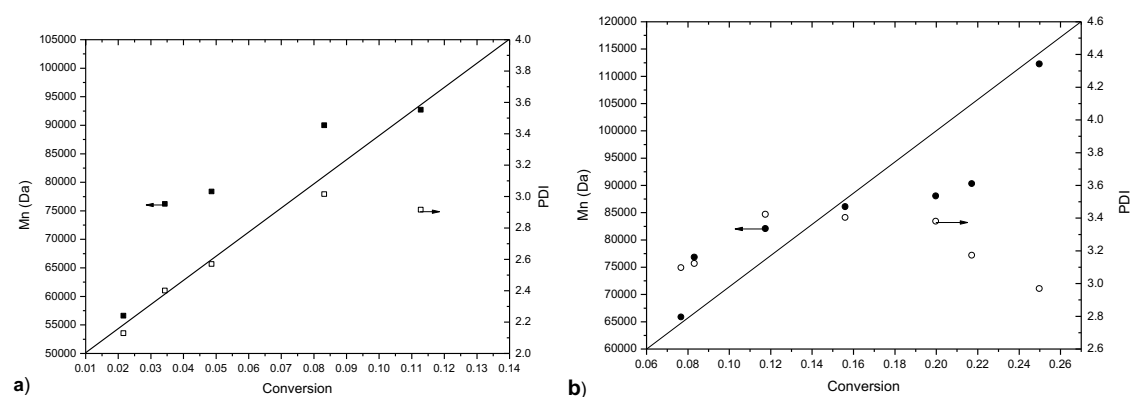

**Figure S1:** Molecular weight (closed symbols) and polydispersity index (open symbols) development with conversion of the polymerization of OEGMA for the (a) HMW alginate macroRAFT agent and (b) LMW alginate macroRAFT agent

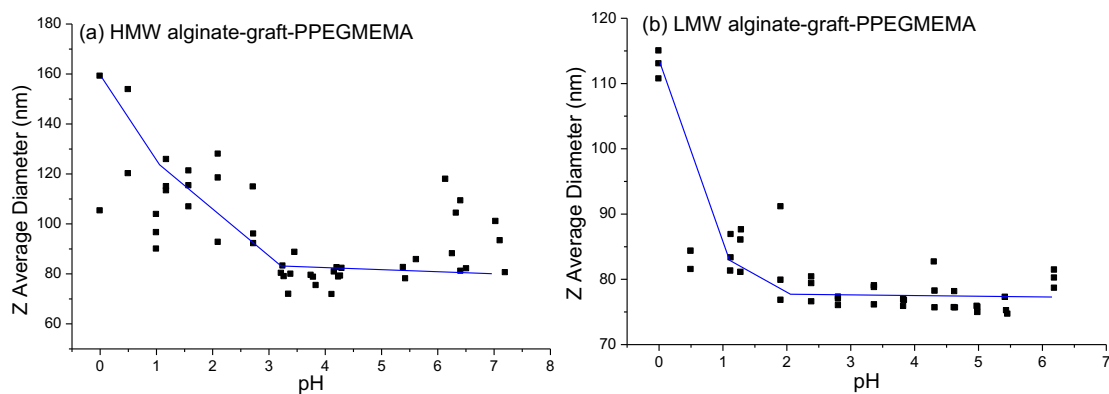

**Figure S2:** Z-average diameter and the associated PDI of 2 mg/mL solution of (a) HMW alginate-graft-POEGMA; or (b) LMW alginate-graft-POEGMA titrated against HCl down to pH: 0

**Table S2:** Z-average particle size and polydispersity index (PDI) of the 2 polymers in different solvents

|                           | Solvent    | Z-average size (nm) | PDI   |
|---------------------------|------------|---------------------|-------|
| HMW Alginate-graft-POEGMA | Water      | 43.7                | 0.347 |
|                           | Chloroform | 64.9                | 0.110 |
|                           | Methanol   | 37.8                | 0.251 |
|                           | Acetone    | 44.4                | 0.373 |
| LMW Alginate-graft-POEGMA | Water      | 43.6                | 0.381 |
|                           | Chloroform | 37.9                | 0.189 |
|                           | Methanol   | 45.95               | 0.256 |
|                           | Acetone    | 31.5                | 0.186 |

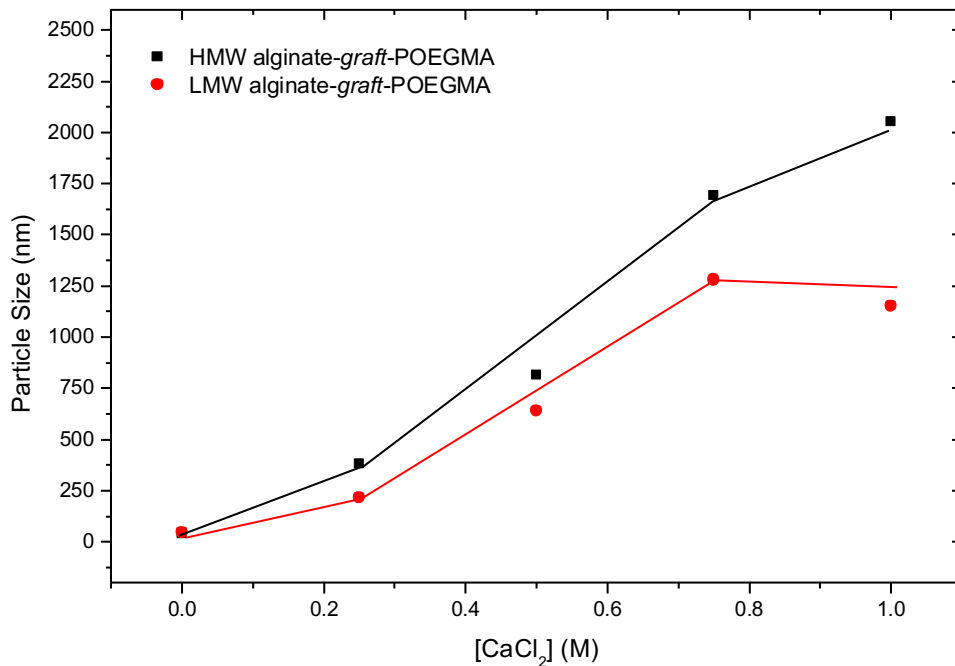

**Figure S3:** Z-average diameter recorded for 2 mg/mL of each polymer in methanol as a function of CaCl<sub>2</sub> concentration

**Table S3:** Encapsulation percentages for the various ratios of 4BR to HMW and LMW alginate-graft-POEGMA when CaCl<sub>2</sub> is introduced into the polymer solution

|     | Ratio of 4BR:poly | Encap (%) | Loading (%) |
|-----|-------------------|-----------|-------------|
| HMW | 1:8               | 87        | 11          |
|     | 1:4               | 68        | 17          |
|     | 1:2               | 67        | 33          |
|     | 1:1               | 64        | 64          |
|     | 2:1               | 68        | 136         |
| LMW | 1:8               | 86        | 11          |
|     | 1:4               | 84        | 21          |
|     | 1:2               | 85        | 43          |
|     | 1:1               | 87        | 87          |
|     | 2:1               | 88        | 176         |

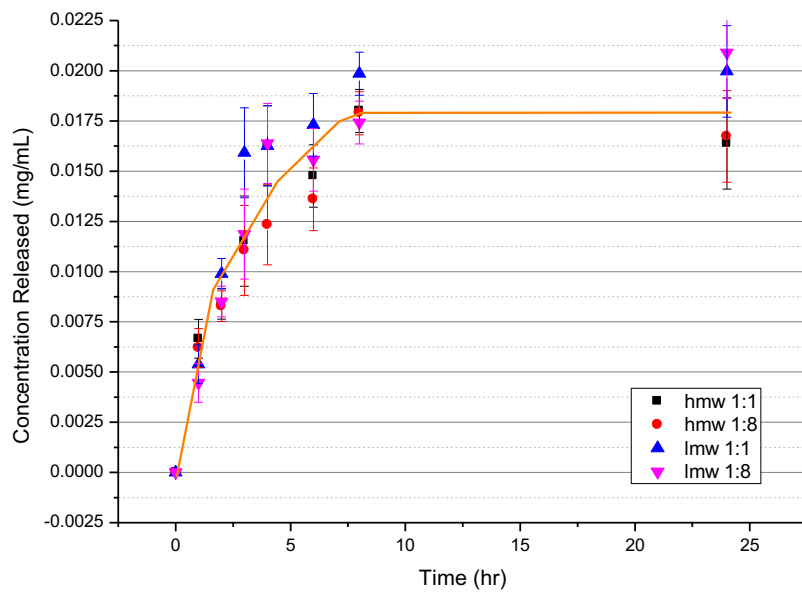

**Figure S4:** Concentration over time of the released 4BR showing a similar quantity of 4BR released over 24 hours irrespective of polymer size or polymer to 4BR ratio
